# Supplementary material for: Sc2F2(B2O5): a deep ultraviolet scandium borate fluoride exhibiting large birefringence induced by the synergistic effect of B2O5and ScOnF2groups
Source: Royal Society of Chemistry journal article supplement (doi:10.1039/d2qi01484j), 2022-01-01
Supplement: d2qi01484j1.pdf [file d2qi01484j1.pdf]

## Supporting Information

### **Sc<sub>2</sub>F<sub>2</sub>(B<sub>2</sub>O<sub>5</sub>): A Deep Ultraviolet Scandium Borate Fluoride Exhibiting Large Birefringence Induced by the Synergistic Effect of B<sub>2</sub>O<sub>5</sub> and ScO<sub>n</sub>F<sub>2</sub> Groups**

Ru-Ling Tang<sup>\*a,b,c</sup>, Wei Xu,<sup>a</sup> Wei-Jie Xie,<sup>b</sup> Chun-Li Hu<sup>\*b</sup>

#### **Supplementary Index**

##### **Tables and Figures.**

**Table S1.** Selected bond distances (Å) and angles (deg) for Sc<sub>2</sub>F<sub>2</sub>(B<sub>2</sub>O<sub>5</sub>).

**Table S2.** Atomic coordinates (x 10<sup>4</sup>), equivalent isotropic displacement parameters (Å<sup>2</sup> x 10<sup>3</sup>) and Calculated bond valence sum (BVS) for Sc<sub>2</sub>F<sub>2</sub>(B<sub>2</sub>O<sub>5</sub>).

**Table S3.** Configuration, anion groups, space group and synthesis condition of known rare earth borate fluorides.

**Figure S1.** Simulated and experimental powder X-ray diffraction patterns of Sc<sub>2</sub>F<sub>2</sub>(B<sub>2</sub>O<sub>5</sub>).

**Figure S2.** Energy dispersive X-ray spectroscopy (EDX) of Sc<sub>2</sub>F<sub>2</sub>(B<sub>2</sub>O<sub>5</sub>).

**Figure S3.** The IR spectrum of Sc<sub>2</sub>F<sub>2</sub>(B<sub>2</sub>O<sub>5</sub>).

**Figure S4.** The TG-DSC curves of Sc<sub>2</sub>F<sub>2</sub>(B<sub>2</sub>O<sub>5</sub>).

Table S1. Selected bond distances (Å) and angles (deg) for Sc<sub>2</sub>F<sub>2</sub>(B<sub>2</sub>O<sub>5</sub>).

|              |           |                    |          |
|--------------|-----------|--------------------|----------|
| Sc(1)-F(1)   | 2.0267(4) | O(1)-B(1)          | 1.337(6) |
| Sc(1)-F(1)#1 | 2.0267(4) | O(2)-B(1)          | 1.350(6) |
| Sc(1)-O(2)   | 2.071(3)  | B(1)-O(3)#2        | 1.418(6) |
| Sc(1)-O(2)#2 | 2.157(3)  | B(2)-O(5)#3        | 1.372(6) |
| Sc(1)-O(4)   | 2.177(3)  | B(2)-O(3)#6        | 1.412(6) |
| Sc(1)-O(5)#3 | 2.188(3)  | O(4)-B(2)          | 1.372(6) |
| Sc(1)-O(3)   | 2.410(3)  | O(1)-B(1)-O(2)     | 126.6(4) |
| Sc(2)-F(2)   | 2.0201(3) | O(1)-B(1)-O(3)#2   | 123.2(4) |
| Sc(2)-F(2)#1 | 2.0201(3) | O(2)-B(1)-O(3)#2   | 110.2(4) |
| Sc(2)-O(5)   | 2.047(3)  | O(4)-B(2)-O(5)#3   | 114.9(4) |
| Sc(2)-O(4)   | 2.056(3)  | O(4)-B(2)-O(3)#6   | 120.8(4) |
| Sc(2)-O(1)   | 2.120(3)  | O(6)#3-B(2)-O(3)#6 | 124.2(4) |
| Sc(2)-O(1)#4 | 2.124(3)  |                    |          |

Symmetry transformations used to generate equivalent atoms:

#1 x, y, z+1 #2 -x,-y,-z+1 #3 x-1/2,-y+1/2, z #4 -x+1,-y,-z+1 #5 x, y, z-1 #6 x+1/2,-y+1/2, z

Table S2. Atomic coordinates ( $\times 10^4$ ), equivalent isotropic displacement parameters ( $\text{Å}^2 \times 10^3$ ) and bond valence sums (BVS) for Sc<sub>2</sub>F<sub>2</sub>(B<sub>2</sub>O<sub>5</sub>).

| Atom  | x/a      | y/b     | z/c  | U(eq) | BVS   |
|-------|----------|---------|------|-------|-------|
| Sc(1) | 318(1)   | 1183(1) | 5000 | 10(1) | 2.988 |
| Sc(2) | 4364(1)  | 1094(1) | 5000 | 9(1)  | 3.104 |
| F(1)  | 195(3)   | 1266(2) | 0    | 32(1) | 0.990 |
| F(2)  | 4326(3)  | 1101(2) | 0    | 30(1) | 0.973 |
| O(1)  | 3741(3)  | -338(2) | 5000 | 15(1) | 2.053 |
| O(2)  | 1278(3)  | -121(2) | 5000 | 17(1) | 2.042 |
| O(3)  | -2090(3) | 1622(2) | 5000 | 20(1) | 1.995 |
| O(4)  | 2435(3)  | 1704(2) | 5000 | 18(1) | 1.981 |
| O(5)  | 5558(3)  | 2285(2) | 5000 | 18(1) | 1.983 |
| B(1)  | 2437(5)  | -651(4) | 5000 | 14(1) | 3.035 |
| B(2)  | 1970(6)  | 2617(4) | 5000 | 21(1) | 2.890 |

Table S3. Configuration, anion groups, space group and synthesis condition of known rare earth borate fluorides.

| Compound                                                                                             | Metal coordination                                                                                                                                                                | Anion groups                    | Space group   | Synthesis condition                             |
|------------------------------------------------------------------------------------------------------|-----------------------------------------------------------------------------------------------------------------------------------------------------------------------------------|---------------------------------|---------------|-------------------------------------------------|
| $\text{LnB}_2\text{O}_4\text{F}$ (Ln= La, Ce)                                                        | $\text{LnO}_7\text{F}_3$                                                                                                                                                          | $\text{BO}_3^{3-}$              | <i>Pbca</i>   | high temperature and high pressure              |
| $\text{Eu}_5(\text{BO}_3)_3\text{F}$                                                                 | $\text{EuO}_8\text{F}$ , $\text{EuO}_7\text{F}$ , $\text{EuO}_7$                                                                                                                  | $\text{BO}_3^{3-}$              | <i>Pnma</i>   | boron nitride crucible, argon flow              |
| $\text{RE}_2(\text{BO}_3)_3\text{F}_3$ ( <i>RE</i> =La, Tb, Dy, Ho)                                  | $\text{REO}_4\text{F}_5$ , $\text{REO}_7\text{F}_2$ , $\text{REO}_3\text{F}_4$ , $\text{REO}_4\text{F}_3$                                                                         | $\text{BO}_3^{3-}$              | <i>P2_1/c</i> | traditional high temperature solid-state method |
| $\text{Gd}_4(\text{BO}_2)_5\text{O}_5\text{F}$                                                       | $\text{GdO}_6\text{F}$ , $\text{GdO}_5\text{F}_2$                                                                                                                                 | $\text{BO}_2^-$                 | <i>Pmnm</i>   | boron nitride crucible, argon flow              |
| $\text{RE}_4\text{B}_4\text{O}_{11}\text{F}_2$ ( <i>RE</i> = La, Pr, Nd, Sm, Eu, Ga, Tb, Dy, Ho, Er) | $\text{REO}_6\text{F}_3$ , $\text{REO}_8\text{F}_2$ , $\text{REO}_{10}$ , $\text{REO}_9\text{F}$ , $\text{REO}_7\text{F}_3$ , $\text{REO}_9\text{F}_2$ , $\text{REO}_7\text{F}_2$ | $\text{B}_4\text{O}_{11}^{10-}$ | <i>C2/c</i>   | high temperature and high pressure              |
| $\text{Ln}_3(\text{BO}_3)_2\text{F}_3$ (Ln =Sm, Eu, and Gd)                                          | $\text{LnO}_4\text{F}_5$ , $\text{LnO}_7\text{F}_2$ .                                                                                                                             | $\text{BO}_3^{3-}$              | <i>C2/c</i>   | traditional high temperature solid-state method |
| $\text{Pr}_4\text{B}_3\text{O}_{10}\text{F}$                                                         | $\text{PrO}_7\text{F}_2$ , $\text{PrO}_8\text{F}$ , $\text{PrO}_9$                                                                                                                | $\text{BO}_3^{3-}$              | $\bar{p}1$    | high temperature and high pressure              |
| $\text{RE}_5(\text{BO}_3)_2\text{F}_9$ ( <i>RE</i> =Dy, Er, Yb, Ho, Tm)                              | $\text{REO}_3\text{F}_5$ , $\text{REO}_3\text{F}_4$ , $\text{REO}_4\text{F}_3$                                                                                                    | $\text{BO}_3^{3-}$              | <i>C2/c</i>   | high temperature and high pressure              |

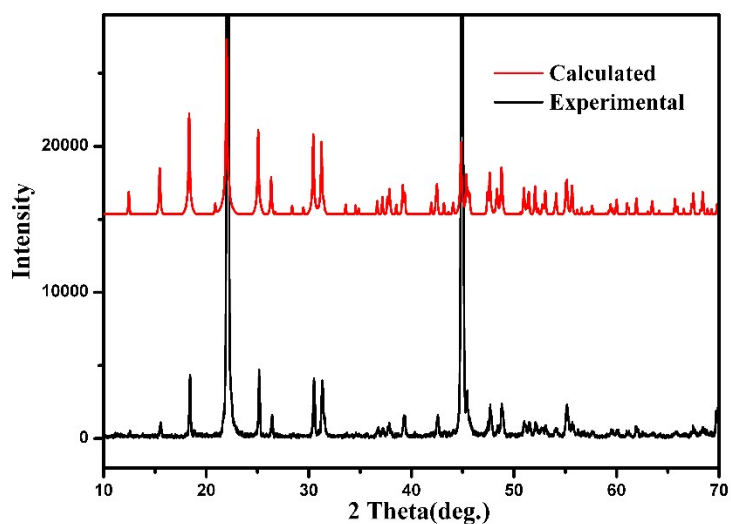

Figure S1. Simulated and experimental powder X-ray diffraction patterns of  $\text{Sc}_2\text{F}_2(\text{B}_2\text{O}_5)$ .

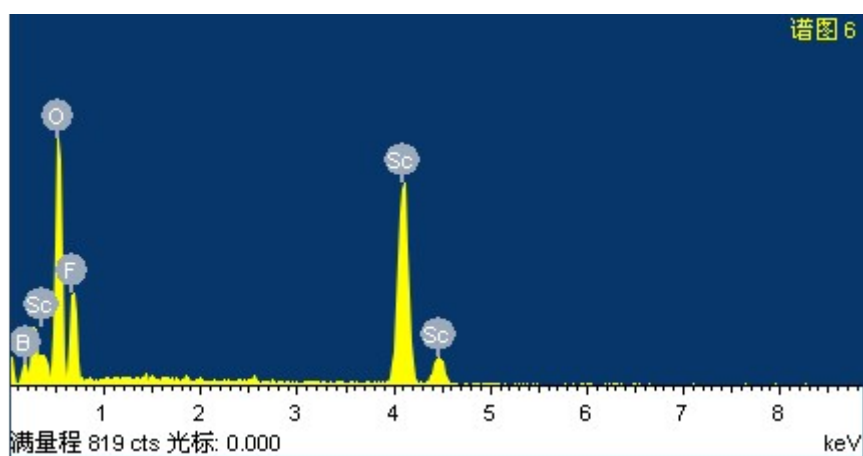

Figure S2. Energy dispersive X-ray spectroscopy (EDX) of  $\text{Sc}_2\text{F}_2(\text{B}_2\text{O}_5)$ .

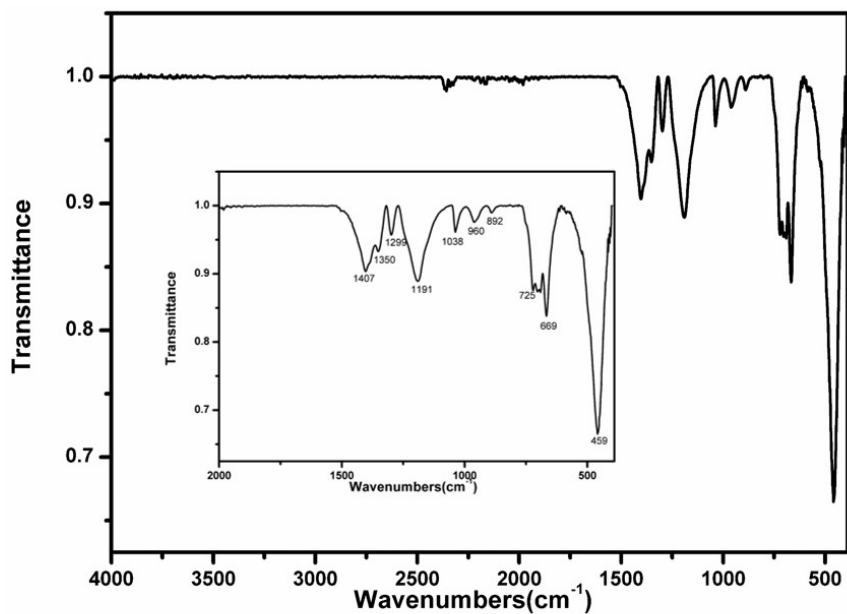

Figure S3. The IR spectrum of  $\text{Sc}_2\text{F}_2(\text{B}_2\text{O}_5)$ .

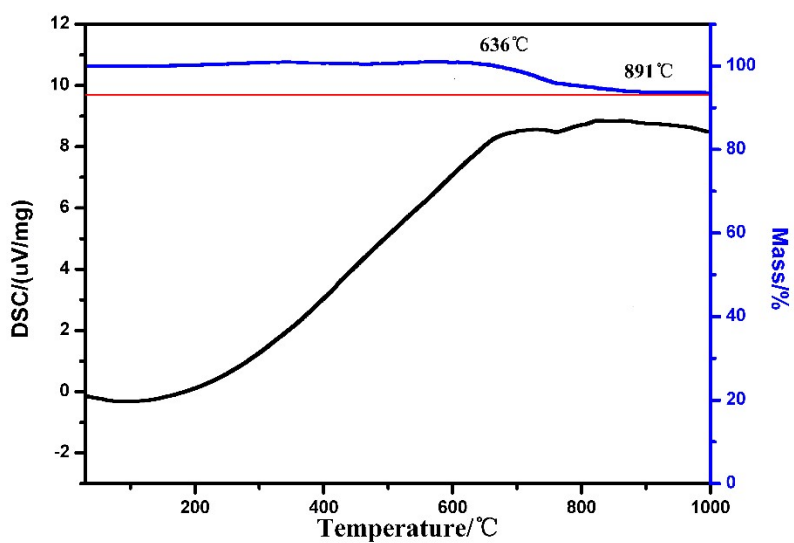

Figure S4. The TG-DSC curves of  $\text{Sc}_2\text{F}_2(\text{B}_2\text{O}_5)$ .
